# Supplementary material
Source: bioRxiv or medRxiv preprint supplement (https://medrxiv.org/highwire/filestream/82820/field_highwire_adjunct_files/0/2020.05.21.20106195-1.pdf)
Supplement: Supplementary file [file 2020.05.21.20106195-1.pdf]

## Supporting Information for Multiplexed and extraction-free amplification for simplified SARS-CoV-2 RT-PCR tests

Samantha A. Byrnes\*<sup>‡</sup>, Ryan Gallagher\*<sup>‡</sup>, Amy Steadman, Crissa Bennett, Rafael Rivera, Corrie Ortega, S. Timothy Motley, Paras Jain, Bernhard H. Weigl, John T. Connelly\*  
Global Good Fund, Intellectual Ventures, Bellevue, WA, USA

This supporting information includes two figures, four tables, and some additional methods.

**Table S1.** Primer and probe sequences for each assay. All sequences are from the CDC 2019-nCoV Real-Time RT-PCR Diagnostic Panel(1). All oligos were ordered with HPLC purification from IDT (Coralville, IA, USA).

| <b>N1 RT-PCR</b>    |                                     |
|---------------------|-------------------------------------|
| N1 forward primer   | GACCCCAAATCAGCGAAAT                 |
| N1 reverse primer   | TCTGGTACTGCCAGTTGAATCTG             |
| N1 singleplex probe | FAM-ACCCCGCATTACGTTTGGTGGACC-IBFQ   |
| N1 triplex probe    | FAM-ACCCCGCATTACGTTTGGTGGACC-IBFQ   |
| <b>N2 RT-PCR</b>    |                                     |
| N2 forward primer   | TTACAAACATTGGCCGCAA                 |
| N2 reverse primer   | GCGCGACATTCCGAAGAA                  |
| N2 singleplex probe | FAM-ACAATTTGCCCCAGCGCTTAG-IBFQ      |
| N2 triplex probe    | TEXASRED-ACAATTTGCCCCAGCGCTTAG-IBRQ |
| <b>RP RTqPCR</b>    |                                     |
| RP forward primer   | AGATTTGGACCTGCGAGCG                 |
| RP reverse primer   | AGATTTGGACCTGCGAGCG                 |
| RP singleplex probe | FAM-TTCTGACCTGAAGGCTCTGCGCG-IBFQ    |
| RP triplex probe    | Cy5-TTCTGACCTGAAGGCTCTGCGCG-IBRQ    |

**Testing the specificity of the multiplex RT-PCR.** We also tested the specificity of the multiplex RT-PCR using 78 clinical samples from Discovery Life Sciences. All samples were SARS-CoV-2 negative and 17 were positive for a variety of other respiratory infections including: influenza A and B, respiratory syncytial virus, pneumoniae, and coronavirus NL63, HKU1, or OC43. None of the samples were positive for SARS-CoV-2 when tested with the multiplex reaction, **Table S2**.

**Table S2.** Ct values each patient sample received from Discovery Life Sciences to test the specificity of the multiplex SARS-CoV-2 RT-PCR. Any Ct above 40 was considered a negative result to align with MIQE guidelines(4). All samples are considered negative based on the CDC guidelines because there were no cases where both N1 and N2 were detected.

| Patient Sample ID | Clinical Test Result | N1 Ct Singleplex | N1 Ct Multiplex | N2 Ct Singleplex | N2 Ct Multiplex | RP Ct Singleplex | RP Ct Multiplex |
|-------------------|----------------------|------------------|-----------------|------------------|-----------------|------------------|-----------------|
| DLS0085387        | Pos – flu B          | -                | -               | -                | -               | 30.22            | 29.92           |
| DLS0085388        | Pos – flu B          | -                | 37.70           | -                | -               | 26.11            | 25.80           |
| DLS0085395        | Pos – flu A          | -                | -               | -                | -               | 22.06            | 21.92           |
| DLS0085406        | -                    | -                | -               | -                | -               | 26.26            | 26.03           |
| DLS0085410        | -                    | -                | -               | -                | -               | 29.55            | 29.33           |
| DLS0085414        | -                    | -                | 37.79           | -                | -               | 26.79            | 26.71           |
| DLS0085415        | -                    | -                | -               | -                | -               | 26.56            | 26.38           |

|            |                           |   |   |   |       |       |       |
|------------|---------------------------|---|---|---|-------|-------|-------|
| DLS0085418 | -                         | - | - | - | -     | 31.36 | 30.80 |
| DLS0085421 | Pos – NL63<br>Coronavirus | - | - | - | -     | 23.56 | 23.3  |
| DLS0085425 | -                         | - | - | - | -     | 27.16 | 26.89 |
| DLS0085430 | -                         | - | - | - | -     | 27.43 | 27.13 |
| DLS0085431 | -                         | - | - | - | -     | 22.67 | 22.3  |
| DLS0085435 | -                         | - | - | - | -     | 28.43 | 28.37 |
| DLS0085437 | -                         | - | - | - | -     | 36.32 | 34.07 |
| DLS0085444 | -                         | - | - | - | -     | 28.91 | 28.62 |
| DLS0085452 | Pos – RSV                 | - | - | - | -     | 23.71 | 26.03 |
| DLS0085464 | Pos – HKU1<br>Coronavirus | - | - | - | -     | 29.21 | 28.90 |
| DLS0085468 | Pos – HKU1<br>Coronavirus | - | - | - | -     | 20.96 | 20.83 |
| DLS0085473 | Pos – C.<br>pneumoniae    | - | - | - | -     | 26.87 | 26.74 |
| KH20-04812 | Pos – flu A               | - | - | - | -     | 25.45 | 25.39 |
| DLS0085420 | Pos – OC43<br>Coronavirus | - | - | - | -     | 25.03 | 27.40 |
| DLS0085456 | Pos – HKU1<br>Coronavirus | - | - | - | -     | 28.03 | 30.60 |
| DLS0085457 | Pos – flu A<br>H1         | - | - | - | 37.87 | 25.33 | 27.88 |
| DLS0085459 | Pos – NL63<br>Coronavirus | - | - | - | -     | 30.28 | 32.93 |
| DLS0085460 | Pos – OC43<br>Coronavirus | - | - | - | -     | 26.83 | 29.15 |
| DLS0085462 | Pos – flu A<br>H1         | - | - | - | -     | 23.99 | 26.54 |
| DLS0085471 | Pos – HKU1<br>Coronavirus | - | - | - | -     | 26.00 | 28.61 |
| DLS0085472 | Pos – NL63<br>Coronavirus | - | - | - | -     | 25.82 | 28.01 |
| 149969     | -                         | - | - | - | -     | 26.79 | 29.02 |
| 151276     | -                         | - | - | - | -     | 31.62 | 33.97 |
| 151280     | -                         | - | - | - | -     | 27.58 | 30.82 |
| 151281     | -                         | - | - | - | -     | 28.33 | 31.71 |
| 151290     | -                         | - | - | - | -     | 29.01 | 31.33 |
| 151292     | -                         | - | - | - | -     | 27.19 | 29.45 |
| 151363     | -                         | - | - | - | -     | 26.60 | 28.85 |
| 155923     | -                         | - | - | - | -     | -     | -     |
| 155924     | -                         | - | - | - | -     | 30.93 | 33.77 |
| 155928     | -                         | - | - | - | -     | 24.93 | 26.81 |
| 155930     | -                         | - | - | - | -     | 29.12 | 31.22 |
| 155933     | -                         | - | - | - | -     | 32.65 | 34.21 |
| 155935     | -                         | - | - | - | -     | 31.53 | 35.37 |
| 155937     | -                         | - | - | - | -     | 29.67 | 33.23 |
| 155941     | -                         | - | - | - | 39.2  | 28.18 | 31.21 |
| 155942     | -                         | - | - | - | -     | 33.43 | 36.18 |
| 155943     | -                         | - | - | - | -     | 31.58 | 34.34 |
| 155944     | -                         | - | - | - | -     | 29.02 | 31.81 |
| 155947     | -                         | - | - | - | -     | 24.04 | 26.50 |
| 155949     | -                         | - | - | - | -     | 26.39 | 29.11 |
| 155953     | -                         | - | - | - | -     | 27.15 | 29.31 |
| 155958     | -                         | - | - | - | -     | 26.61 | 29.18 |
| 155959     | -                         | - | - | - | -     | 27.78 | 30.25 |

|        |   |   |       |   |       |       |       |
|--------|---|---|-------|---|-------|-------|-------|
| 155960 | - | - | -     | - | -     | 30.15 | 32.72 |
| 155961 | - | - | -     | - | -     | 27.77 | 30.27 |
| 155966 | - | - | -     | - | -     | 23.93 | 26.27 |
| 155967 | - | - | -     | - | -     | 29.44 | 31.88 |
| 155968 | - | - | -     | - | -     | -     | -     |
| 155971 | - | - | -     | - | -     | 33.37 | 35.48 |
| 155976 | - | - | -     | - | -     | 28.38 | 30.95 |
| 155977 | - | - | -     | - | -     | 29.84 | 31.96 |
| 155978 | - | - | -     | - | -     | 31.25 | 33.44 |
| 155980 | - | - | -     | - | -     | 29.56 | 31.57 |
| 156427 | - | - | -     | - | -     | 29.81 | 32.04 |
| 156432 | - | - | -     | - | -     | 23.04 | 25.36 |
| 156434 | - | - | -     | - | -     | 27.27 | 29.66 |
| 156435 | - | - | -     | - | -     | 29.55 | 31.86 |
| 156441 | - | - | -     | - | -     | 25.48 | 27.67 |
| 156444 | - | - | -     | - | -     | 30.99 | 33.22 |
| 156445 | - | - | -     | - | -     | 34.92 | 36.72 |
| 156446 | - | - | -     | - | -     | 27.16 | 29.45 |
| 156452 | - | - | -     | - | -     | 23.90 | 25.98 |
| 156461 | - | - | -     | - | -     | 28.27 | 30.94 |
| 156466 | - | - | -     | - | -     | 24.96 | 27.44 |
| 156469 | - | - | -     | - | -     | 27.98 | 30.20 |
| 156470 | - | - | -     | - | -     | 29.33 | 31.97 |
| 156471 | - | - | 37.69 | - | -     | 32.80 | 34.33 |
| 156473 | - | - | -     | - | 37.05 | 30.32 | 32.40 |
| 156489 | - | - | -     | - | -     | 28.24 | 30.42 |
| 156494 | - | - | -     | - | -     | 27.14 | 29.08 |

The Washington State Department of Health (DOH) Public Health Laboratories (Shoreline, WA, USA) provided us 90 patient samples. The samples were collected in March 2020 from nasopharyngeal (NP) swabs added to VTM and included 30 SARS-CoV-2 positives and 60 negatives. **Table S3** summarizes the results of the CDC singleplex test and the multiplex test for each sample.

**Table S3.** Ct values, SARS-CoV-2 viral load (c/μL of sample), and human RNA load (c/μL of sample) for each patient sample used in this work. Viral and RNA loads were calculated based on the Ct value from the N1 gene using the CDC singleplex test. The viral loads for the SARS-CoV-2 positive samples ranged from  $1 \times 10^0 - 1 \times 10^7$  c/μL of sample with an average viral load of  $6 \times 10^5$  c/μL (N=30). The detected human RNA in SARS-CoV-2 positive samples ranged from  $2 \times 10^1 - 4 \times 10^3$  c/μL with an average of  $8 \times 10^2$  c/μL (N=30). For the negative samples, the human RNA ranged from  $1 \times 10^1 - 5 \times 10^4$  c/μL with an average of  $3 \times 10^3$  c/μL. If a sample was run multiple times, the average value of the runs (either Ct or viral load) is reported. Any Ct above 40 was considered a negative result to align with MIQE guidelines(4). \*These values had one or more replicate that did not result in a Ct value. \*\* These samples with no RP signal had very high levels of SARS-CoV-2 RNA ( $>10^5$  c/μL), suggesting that the pathogen targets competitively inhibited the human target during amplification.

| Patient Sample ID                  | SARS-CoV-2 (c/μL) | Human RNA (c/μL)  | N1 Ct Singleplex | N1 Ct Multiplex | N2 Ct Singleplex | N2 Ct Multiplex | RP Ct Singleplex | RP Ct Multiplex |
|------------------------------------|-------------------|-------------------|------------------|-----------------|------------------|-----------------|------------------|-----------------|
| <b>SARS-CoV-2 Positive Samples</b> |                   |                   |                  |                 |                  |                 |                  |                 |
| WA0361948                          | $5.9 \times 10^2$ | $6.3 \times 10^2$ | 28.46            | 27.99           | 25.50            | 29.76           | 28.54            | 28.98           |
| WA0361856                          | $1.7 \times 10^0$ | $2.4 \times 10^3$ | 36.80            | 38.11*          | 34.61            | -               | 26.66            | 26.90           |

|           |                     |                     |       |        |        |        |       |       |
|-----------|---------------------|---------------------|-------|--------|--------|--------|-------|-------|
| WA0364405 | 2.7x10 <sup>2</sup> | 7.5x10 <sup>2</sup> | 29.75 | 29.34  | 27.95  | 32.06  | 28.29 | 28.63 |
| WA0364834 | 3.1x10 <sup>0</sup> | 1.3x10 <sup>2</sup> | 35.93 | 37.16  | 37.80  | 37.51* | 30.77 | 31.58 |
| WA0364831 | 2.0x10 <sup>0</sup> | 2.6x10 <sup>3</sup> | 36.53 | 37.82  | 35.46  | 38.73* | 26.57 | 27.14 |
| WA0364810 | 2.5x10 <sup>1</sup> | 4.3x10 <sup>2</sup> | 32.94 | 33.03  | 31.71  | 37.47  | 29.07 | 29.24 |
| WA0364450 | 1.1x10 <sup>2</sup> | 4.5x10 <sup>2</sup> | 30.85 | 30.53  | 28.02  | 33.42  | 29.00 | 29.16 |
| WA0364806 | 6.7x10 <sup>3</sup> | 4.1x10 <sup>3</sup> | 25.02 | 24.53  | 23.25  | 26.24  | 25.90 | 26.17 |
| WA0364447 | 5.9x10 <sup>3</sup> | 8.9x10 <sup>1</sup> | 25.18 | 24.92  | 22.68  | 26.7   | 31.28 | 35.57 |
| WA0364449 | -                   | 2.4x10 <sup>2</sup> | -     | 37.23  | -      | -      | 29.89 | 30.09 |
| WA0364426 | 1.1x10 <sup>1</sup> | 1.6x10 <sup>2</sup> | 34.08 | 34.05  | 32.82  | 38.3   | 30.14 | 30.87 |
| WA0364428 | 2.8x10 <sup>2</sup> | 6.8x10 <sup>2</sup> | 29.50 | 29.26  | 26.93  | 31.05  | 28.43 | 28.92 |
| WA0364416 | 9.6x10 <sup>2</sup> | 2.5x10 <sup>2</sup> | 27.77 | 27.11  | 24.93  | 28.17  | 29.81 | 30.51 |
| WA0363478 | 1.1x10 <sup>0</sup> | 4.1x10 <sup>2</sup> | 37.42 | 38.10* | 34.46  | 39.66* | 29.14 | 29.73 |
| WA0364750 | 1.1x10 <sup>5</sup> | 1.9x10 <sup>2</sup> | 21.08 | 25.41  | 23.51  | 26.99  | 30.21 | 32.39 |
| WA0364742 | 1.4x10 <sup>7</sup> | 2.2x10 <sup>2</sup> | 14.14 | 25.08  | 24.40  | 26.44  | 30.02 | 31.12 |
| WA0364746 | 5.4x10 <sup>3</sup> | 2.4x10 <sup>2</sup> | 25.32 | 37.01* | 37.24  | 36.06* | 29.91 | 27.36 |
| WA0364749 | 1.6x10 <sup>6</sup> | 1.7x10 <sup>3</sup> | 19.82 | 20.67  | 21.89  | 21.62  | 27.15 | **    |
| WA0364736 | 2.1x10 <sup>6</sup> | 5.5x10 <sup>2</sup> | 16.83 | 13.97  | 14.632 | 14.17  | 28.74 | **    |
| WA0364723 | 1.4x10 <sup>4</sup> | 7.8x10 <sup>2</sup> | 23.96 | 27.36  | 25.21  | 29.12  | 28.24 | 28.66 |
| WA0364727 | 9.5x10 <sup>2</sup> | 8.3x10 <sup>2</sup> | 27.78 | 16.49  | 15.02  | 16.86  | 28.14 | **    |
| WA0364714 | 5.0x10 <sup>5</sup> | 8.8x10 <sup>2</sup> | 18.90 | 18.54  | 18.51  | 19.1   | 28.07 | **    |
| WA0364715 | 6.3x10 <sup>4</sup> | 2.2x10 <sup>2</sup> | 21.84 | 27.4   | 27.57  | 29.07  | 30.03 | 36.31 |
| WA0364718 | 1.1x10 <sup>3</sup> | 1.5x10 <sup>1</sup> | 27.62 | 23.92  | 23.69  | 25.05  | 33.79 | 31.00 |
| WA0364698 | 6.5x10 <sup>3</sup> | 1.8x10 <sup>2</sup> | 25.05 | 25.11  | 22.31  | 26.23  | 30.29 | 34.49 |
| WA0364702 | 8.3x10 <sup>3</sup> | 1.2x10 <sup>3</sup> | 24.70 | 24.62  | 23.10  | 25.4   | 27.66 | 29.16 |
| WA0364795 | 4.8x10 <sup>3</sup> | 1.5x10 <sup>2</sup> | 25.48 | 21.45  | 19.76  | 22.22  | 30.51 | **    |
| WA0364692 | 5.6x10 <sup>2</sup> | 1.8x10 <sup>3</sup> | 28.54 | 28.04  | 26.60  | 29.7   | 27.70 | 27.47 |
| WA0364695 | 3.2x10 <sup>3</sup> | 5.3x10 <sup>2</sup> | 26.07 | 25.74  | 24.00  | 27.19  | 28.77 | 29.46 |
| WA0364515 | 2.6x10 <sup>0</sup> | 1.5x10 <sup>1</sup> | 36.20 | 35.61  | 36.87  | 37.37  | 33.80 | 34.04 |

**SARS-CoV-2 Negative Samples**

|           |   |                     |   |        |   |        |       |       |
|-----------|---|---------------------|---|--------|---|--------|-------|-------|
| WA0361631 | - | 8.6x10 <sup>3</sup> | - | -      | - | -      | 27.13 | 30.27 |
| WA0361632 | - | 3.1x10 <sup>3</sup> | - | -      | - | -      | 28.56 | 30.18 |
| WA0361633 | - | 5.6x10 <sup>3</sup> | - | -      | - | 33.98* | 27.74 | 30.82 |
| WA0361634 | - | 1.3x10 <sup>4</sup> | - | -      | - | -      | 26.59 | 29.14 |
| WA0361635 | - | 1.5x10 <sup>4</sup> | - | -      | - | -      | 26.38 | 30.12 |
| WA0361636 | - | 1.3x10 <sup>2</sup> | - | -      | - | -      | 33.03 | 30.37 |
| WA0361637 | - | 9.2x10 <sup>3</sup> | - | -      | - | -      | 27.03 | 30.10 |
| WA0361638 | - | 6.0x10 <sup>3</sup> | - | -      | - | -      | 27.64 | 31.18 |
| WA0361639 | - | 3.7x10 <sup>3</sup> | - | -      | - | -      | 28.30 | 32.52 |
| WA0361640 | - | 1.8x10 <sup>4</sup> | - | -      | - | -      | 26.11 | 28.68 |
| WA0361641 | - | 7.0x10 <sup>3</sup> | - | -      | - | -      | 27.42 | 32.59 |
| WA0361642 | - | 1.6x10 <sup>3</sup> | - | -      | - | -      | 29.44 | 30.86 |
| WA0361643 | - | 3.0x10 <sup>3</sup> | - | -      | - | -      | 28.58 | 30.39 |
| WA0361644 | - | 2.1x10 <sup>3</sup> | - | -      | - | -      | 29.09 | 29.47 |
| WA0361645 | - | 4.4x10 <sup>3</sup> | - | -      | - | -      | 28.07 | 32.40 |
| WA0361646 | - | 4.3x10 <sup>3</sup> | - | -      | - | -      | 28.10 | 33.32 |
| WA0361647 | - | 9.2x10 <sup>3</sup> | - | -      | - | -      | 27.03 | 29.10 |
| WA0361648 | - | 9.4x10 <sup>3</sup> | - | -      | - | -      | 27.01 | 30.69 |
| WA0361649 | - | 5.4x10 <sup>3</sup> | - | 38.19* | - | -      | 27.79 | 30.11 |
| WA0361650 | - | 1.4x10 <sup>4</sup> | - | -      | - | -      | 26.43 | 28.99 |
| WA0361651 | - | 6.5x10 <sup>3</sup> | - | -      | - | -      | 27.51 | 28.96 |
| WA0361652 | - | 4.4x10 <sup>3</sup> | - | -      | - | -      | 28.06 | 36.25 |
| WA0361653 | - | 5.3x10 <sup>3</sup> | - | -      | - | -      | 27.80 | 33.71 |
| WA0361654 | - | 1.8x10 <sup>3</sup> | - | -      | - | -      | 29.30 | 30.06 |
| WA0361655 | - | 8.4x10 <sup>2</sup> | - | -      | - | -      | 30.38 | 30.69 |
| WA0361656 | - | 1.1x10 <sup>4</sup> | - | -      | - | -      | 26.80 | 28.23 |

|           |   |                     |   |        |       |        |       |       |
|-----------|---|---------------------|---|--------|-------|--------|-------|-------|
| WA0361657 | - | 1.0x10 <sup>3</sup> | - | -      | -     | -      | 30.13 | 29.38 |
| WA0361659 | - | 3.8x10 <sup>3</sup> | - | -      | 41.76 | -      | 28.29 | 31.54 |
| WA0361660 | - | 5.7x10 <sup>3</sup> | - | -      | -     | -      | 27.70 | 30.81 |
| WA0361661 | - | 1.3x10 <sup>4</sup> | - | -      | -     | -      | 26.51 | 31.20 |
| WA0634299 | - | 4.5x10 <sup>2</sup> | - | -      | -     | -      | 29.01 | 29.39 |
| WA0634300 | - | 1.1x10 <sup>2</sup> | - | -      | -     | -      | 30.98 | 31.32 |
| WA0634302 | - | 4.2x10 <sup>2</sup> | - | -      | -     | -      | 29.09 | 29.11 |
| WA0634303 | - | 7.9x10 <sup>2</sup> | - | -      | -     | -      | 28.22 | 28.54 |
| WA0634304 | - | 8.8x10 <sup>1</sup> | - | -      | -     | -      | 31.30 | 31.61 |
| WA0634305 | - | 6.2x10 <sup>1</sup> | - | -      | -     | -      | 31.77 | 32.29 |
| WA0634309 | - | 1.2x10 <sup>3</sup> | - | -      | -     | -      | 27.67 | 28.48 |
| WA0635231 | - | 2.2x10 <sup>3</sup> | - | -      | -     | -      | 26.77 | 27.53 |
| WA0635242 | - | 3.3x10 <sup>2</sup> | - | 22.00  | -     | 22.99  | 29.44 | 38.55 |
| WA0635243 | - | 3.3x10 <sup>2</sup> | - | 36.10  | -     | -      | 29.42 | 29.91 |
| WA0635244 | - | 2.0x10 <sup>2</sup> | - | 37.73  | -     | -      | 30.13 | 30.87 |
| WA0635245 | - | 1.0x10 <sup>4</sup> | - | 35.12  | -     | 35.61* | 24.62 | 25.35 |
| WA0635251 | - | 4.3x10 <sup>3</sup> | - | -      | -     | -      | 25.86 | 26.71 |
| WA0635252 | - | 1.2x10 <sup>3</sup> | - | -      | -     | -      | 27.58 | 28.24 |
| WA0635397 | - | 1.6x10 <sup>3</sup> | - | -      | -     | -      | 27.27 | 28.12 |
| WA0635384 | - | 7.6x10 <sup>2</sup> | - | -      | -     | -      | 28.28 | 29.00 |
| WA0635385 | - | 2.0x10 <sup>2</sup> | - | -      | -     | -      | 30.17 | 30.80 |
| WA0635386 | - | 2.1x10 <sup>2</sup> | - | -      | -     | -      | 30.07 | 31.04 |
| WA0635387 | - | 1.8x10 <sup>2</sup> | - | -      | -     | -      | 30.28 | 31.00 |
| WA0634310 | - | 3.3x10 <sup>2</sup> | - | -      | -     | -      | 29.43 | 29.65 |
| WA0634311 | - | 3.8x10 <sup>2</sup> | - | -      | -     | -      | 29.23 | 29.72 |
| WA0635227 | - | 8.5x10 <sup>2</sup> | - | -      | -     | -      | 28.11 | 28.76 |
| WA0635228 | - | 4.0x10 <sup>2</sup> | - | 38.44* | -     | -      | 29.16 | 29.79 |
| WA0635229 | - | 1.6x10 <sup>3</sup> | - | -      | -     | -      | 27.27 | 27.80 |
| WA0635391 | - | 6.4x10 <sup>2</sup> | - | -      | -     | -      | 28.52 | 29.35 |
| WA0635401 | - | 1.5x10 <sup>3</sup> | - | -      | -     | -      | 27.33 | 28.14 |
| WA0635405 | - | 6.1x10 <sup>2</sup> | - | -      | -     | -      | 28.57 | 29.05 |
| WA0635410 | - | 1.4x10 <sup>1</sup> | - | -      | -     | -      | 33.86 | 33.96 |
| WA0635411 | - | 1.1x10 <sup>4</sup> | - | -      | -     | -      | 24.47 | 24.87 |
| WA0635412 | - | 4.7x10 <sup>4</sup> | - | -      | -     | -      | 22.50 | 22.94 |

**Impact of viral transport media on RT-PCR.** The fold-change in Ct values between the control sample of RNA in 10 mM Tris, pH 8, and RNA in VTM was calculated to determine the impact on amplification. If a condition did not have a Ct value, it was set to 45, the maximum number of cycles, to determine a  $\Delta Ct$ . Fold-change was calculated by first determining the  $\Delta Ct$  between the Tris control and the VTM experimental sample. **Figure S1** reports the  $\Delta Ct$  for each stock VTM/MM combination to compare to Figure 2 which reports the corresponding fold-changes in the main manuscript. Heatmaps were generated using the “*ArrayPlot*” function and the built-in “*RedGreenSplit*” color scheme in Mathematica software(2).

$$Tris\ Ct - Experimental\ Ct = \Delta Ct$$

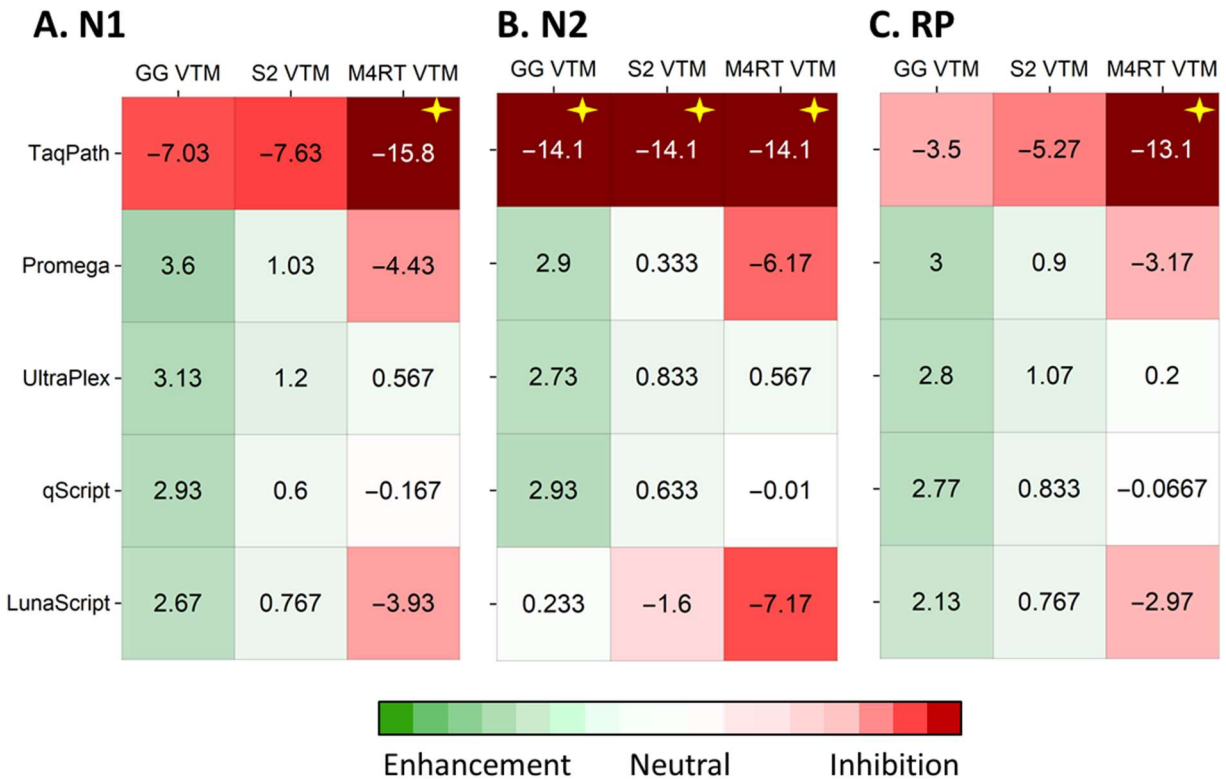

**Figure S1.** The  $\Delta C_t$  values used to determine the fold-change for the studies exploring the impact of VTM on the CDC singleplex test. These data correspond to the fold-change data presented in Figure 2 in the main manuscript. If a condition did not have a  $C_t$  value it was set to 45 to generate a difference in  $C_t$  measure. Conditions marked with a “✦” indicate at least one of the replicates did not have a  $C_t$  value after 45 cycles resulting in complete amplification inhibition. All reported values are averages of  $N=3$  per condition. The SARS-CoV-2 and human RNA were kept constant at  $820\text{ c}/\mu\text{L}$  and  $2000\text{ c}/\mu\text{L}$ , respectively. **A.** Impact on SARS-CoV-2 N1 target, **B.** N2 target, and **C.** the human RP target.

Fold-change was then calculated as detailed below using the  $\Delta C_t$ , ‘abs’ refers to taking the absolute value of the  $\Delta C_t$ . **Figure S2** shows the fold-change for conditions with varying VTM dilutions.

$$\text{Fold - change} = 2^{\text{abs}(\Delta C_t)} * \text{sign of } \Delta C_t$$

### A. 1:10 VTM Dilution N1, N2, RP

|            | GG VTM | S2 VTM | M4RT VTM | GG VTM | S2 VTM | M4RT VTM | GG VTM | S2 VTM | M4RT VTM |
|------------|--------|--------|----------|--------|--------|----------|--------|--------|----------|
| TaqPath    | 3.2    | 0.8    | -17337.0 | 1.7    | -1.7   | -7334.0  | 2.4    | 0.3    | -20.9    |
| Promega    | 4.1    | 0.3    | -2.5     | 4.2    | 0.7    | -3.9     | 2.5    | 0.4    | -3.2     |
| UltraPlex  | 4.9    | 1.4    | 1.2      | 3.8    | 1.3    | 0.6      | 2.9    | 1.1    | -0.3     |
| qScript    | 2.9    | 1.1    | -1.2     | 3.3    | 1.2    | -1.2     | 2.3    | 1.1    | -1.3     |
| LunaScript | 3.7    | 1.3    | -2.1     | 3.7    | 0.6    | -6.6     | 3.1    | 0.4    | -2.0     |

### B. 1:100 VTM Dilution N1, N2, RP

|            | GG VTM | S2 VTM | M4RT VTM | GG VTM | S2 VTM | M4RT VTM | GG VTM | S2 VTM | M4RT VTM |
|------------|--------|--------|----------|--------|--------|----------|--------|--------|----------|
| TaqPath    | 0.9    | 1.4    | -11.4    | 0.4    | 0.3    | -1.3     | -0.4   | -0.4   | -0.3     |
| Promega    | 0.6    | -0.2   | -0.7     | 0.6    | 0.6    | -1.4     | -0.4   | -0.4   | -0.7     |
| UltraPlex  | 1.4    | 0.5    | -0.5     | 1.2    | 1.3    | -1.4     | 0.4    | 0.3    | -1.8     |
| qScript    | 0.3    | 1.1    | -1.5     | 1.2    | 1.2    | -1.4     | -1.1   | 1.0    | -1.4     |
| LunaScript | 1.1    | 1.1    | -0.7     | -0.3   | 0.4    | -1.1     | 0.3    | -1.1   | -1.2     |

### C. 1:1000 VTM Dilution N1, N2, RP

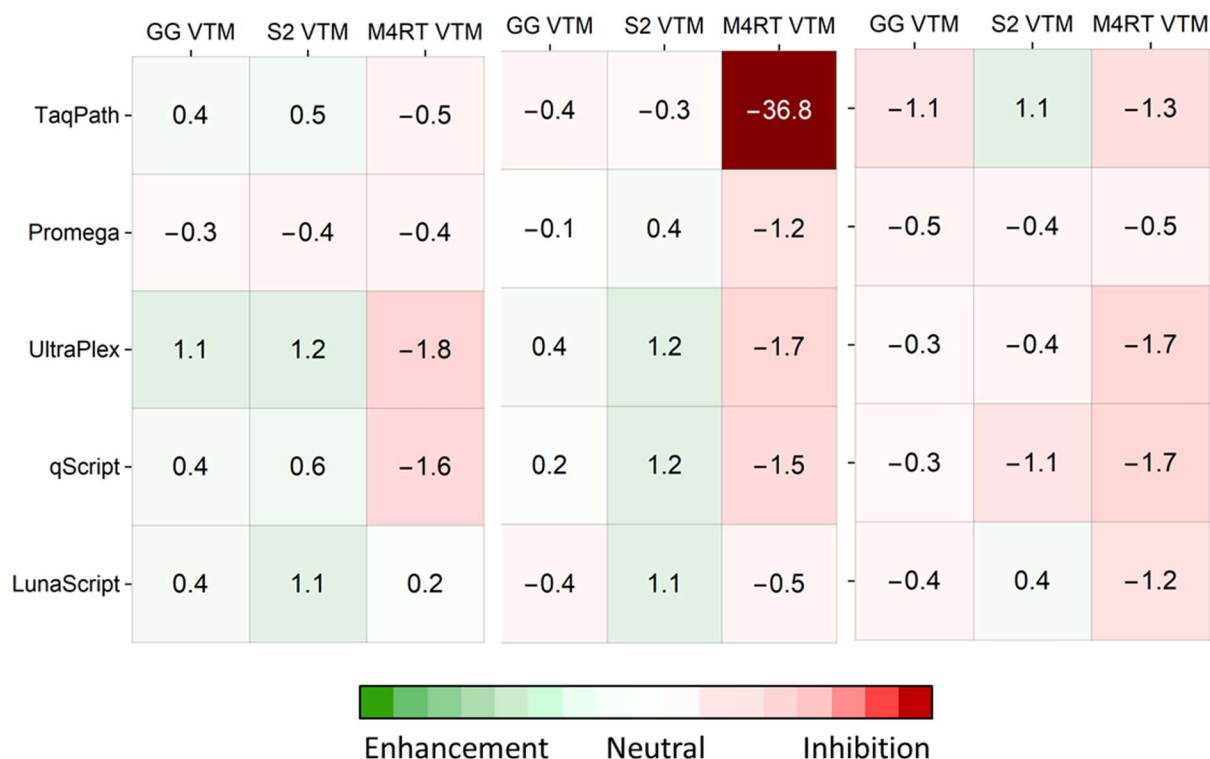

**Figure S2.** Impact of VTM on the CDC singleplex test. The TaqPath MM was the least inhibitor tolerant while both the UltraPlex and qScript MMs were the most tolerant and even showed some amplification enhancement. The amplification enhancement and inhibition are reduced or entirely removed when diluted VTM is tested. The data presented are fold-change in Ct values between RNA spiked in VTM and control reactions of RNA spiked in 10 mM Tris buffer, pH 8. If a condition did not have a Ct value it was set to 45 to generate a difference in Ct measure. Conditions marked with a “✦” indicate at least one of the replicates did not have a Ct value after 45 cycles indicating complete amplification inhibition. All reported values are averages of N=3 per condition. The M4RT VTM resulted in the most inhibition across all dilutions and master mixes tested. **A.** Impact of 1:10 VTM dilution in 10 mM Tris, pH8, **B.** 1:100, and **C.** 1:1000.

**Concordance of SARS-CoV-2 detection using the multiplex RT-PCR.** SARS-CoV-2 RNA was purified from 90 patient samples and tested in the multiplex RT-PCR using the TaqPath MM. Some of these samples were tested with up to three replicates each to determine concordance. **Table S4** details the results of the replicates; a final positive v. negative determination was made based on the average of the three replicates. To identify a sample as positive, the CDC EUA requires both N1 and N2 to be detected(3). Any Ct above 40 was considered a negative result to align with MIQE guidelines(4).

**Table S4.** Replicates of multiplex SARS-CoV-2 RT-PCR using the TaqPath MM with purified RNA from clinical samples. Four samples were concordant across all replicates.



| Patient ID                       | Replicate 1 |    |    | Replicate 2 |    |    | Replicate 3 |    |    | Clinical concordance |    |    |    |
|----------------------------------|-------------|----|----|-------------|----|----|-------------|----|----|----------------------|----|----|----|
|                                  | Target      | N1 | N2 | RP          | N1 | N2 | RP          | N1 | N2 | RP                   | N1 | N2 | RP |
| <b>Positive clinical samples</b> |             |    |    |             |    |    |             |    |    |                      |    |    |    |
| WA0361856                        | +           | -  | +  | +           | -  | +  | -           | -  | +  | +                    | -  | +  |    |
| WA0364834                        | +           | -  | +  | +           | +  | +  | +           | -  | +  | +                    | -  | +  |    |
| WA0364831                        | +           | -  | +  | +           | +  | +  | +           | +  | +  | +                    | +  | +  |    |
| WA0364449                        | +           | -  | +  | -           | -  | +  | No Sample   |    |    | -                    | +  |    |    |
| WA0364416                        | +           | +  | +  | +           | +  | +  | +           | +  | +  | +                    | +  | +  |    |
| WA0363478                        | +           | -  | +  | -           | -  | +  | +           | +  | +  | +                    | -  | +  |    |
| WA0364746                        | +           | -  | +  | -           | +  | +  | +           | +  | -  | +                    | +  | +  |    |
| WA0364515                        | +           | +  | +  | +           | +  | +  | +           | +  | +  | +                    | +  | +  |    |
| <b>Negative clinical samples</b> |             |    |    |             |    |    |             |    |    |                      |    |    |    |
| WA0361633                        | -           | +  | +  | -           | -  | +  | -           | -  | +  | -                    | -  | +  |    |
| WA0361649                        | +           | -  | +  | -           | -  | +  | -           | -  | +  | -                    | -  | +  |    |
| WA0635242                        | +           | +  | +  | +           | +  | +  | +           | +  | +  | +                    | +  | +  |    |
| WA0635243                        | +           | -  | +  | +           | -  | +  | +           | -  | +  | +                    | -  | +  |    |
| WA0635244                        | +           | -  | +  | -           | -  | +  | +           | -  | +  | +                    | -  | +  |    |
| WA0625245                        | +           | -  | +  | +           | -  | +  | +           | +  | +  | +                    | -  | +  |    |
| WA0635228                        | +           | -  | +  | -           | -  | +  | -           | -  | +  | -                    | -  | +  |    |
| WA0365401                        | -           | -  | +  | -           | -  | +  | -           | -  | +  | -                    | -  | +  |    |

## References

1. CDC. CDC 2019-nCoV Real-Time RT-PCR Diagnostic Panel Product Information Sheet [Internet] SOP# CDC-006-00006 [Internet]. 2020. Available from: <https://www.fda.gov/media/134922/download>
2. Wolfram Resarch Inc. Mathematica [Internet]. Version 12. Champaign, Illinois: Wolfram Resarch Inc.; 2020. Available from: <https://www.wolfram.com/mathematica>
3. CDC. CDC 2019-Novel Coronavirus (2019-nCoV) Real-Time RT-PCR Diagnostic Panel SOP# CDC-006-00019. 2020.
4. Bustin SA, Benes V, Garson JA, Hellemans J, Huggett J, Kubista M, et al. The MIQE Guidelines : Minimum Information for Publication of Quantitative Real-Time PCR Experiments. Clin Chem. 2009;55(4):611–22.

Address for correspondence: Intellectual Ventures Laboratory, 14360 SE Eastgate Way  
Bellevue, 98007, WA, USA

Samantha A. Byrnes: [sbyrnes@intven.com](mailto:sbyrnes@intven.com)

Ryan Gallagher: [rgallagher@intven.com](mailto:rgallagher@intven.com)

John T. Connelly: [jconnelly@intven.com](mailto:jconnelly@intven.com)
